# Supplementary material for: Large magnetic entropy changes in three GdIIIcoordination polymers containing GdIIIchains
Source: Royal Society of Chemistry journal article supplement (doi:10.1039/c7nj01463e), 2017-01-01
Supplement: c7nj01463e1.pdf [file c7nj01463e1.pdf]

*Electronic Supplementary Information (ESI)*

**Large magnetic entropy changes in three Gd<sup>III</sup> coordination polymers containing Gd<sup>III</sup> chains**

**Teng-Fei Zheng,<sup>†</sup> Shu-Li Yao,<sup>†</sup> Chen Cao, Sui-Jun Liu,\* Hui-Kang Hu, Tao Zhang, Hai-Ping Huang, Jin-Sheng Liao, Jing-Lin Chen and He-Rui Wen\***

School of Metallurgy and Chemical Engineering, Jiangxi University of Science and Technology, Ganzhou 341000, Jiangxi Province, P.R. China

---

\*Corresponding author. E-mail: liusuijun147@163.com (S.-J. Liu), wenherui63@163.com (H.-R. Wen).

Tel: +86-797-8312204.

<sup>†</sup>T.-F.Z. and Y.-S.L. contributed equally to this work and should be considered co-first authors.

**Table S1.** Selected bond lengths (Å) and angles (°) for **1<sup>a</sup>**

|                                        |           |                                          |            |
|----------------------------------------|-----------|------------------------------------------|------------|
| Gd1—O3                                 | 2.318(7)  | Gd2—O5                                   | 2.298(6)   |
| Gd1—O9 <sup>#1</sup>                   | 2.339(6)  | Gd2—O11 <sup>#1</sup>                    | 2.338(6)   |
| Gd1—O7                                 | 2.365(6)  | Gd2—O4                                   | 2.365(6)   |
| Gd1—O2 <sup>#1</sup>                   | 2.398(6)  | Gd2—O6 <sup>#2</sup>                     | 2.398(6)   |
| Gd1—O12                                | 2.452(6)  | Gd2—O10 <sup>#3</sup>                    | 2.439(6)   |
| Gd1—O1W                                | 2.547(7)  | Gd2—N3                                   | 2.552(8)   |
| Gd1—N2                                 | 2.559(9)  | Gd2—O2W                                  | 2.557(7)   |
| Gd1—N1                                 | 2.607(8)  | Gd2—N4                                   | 2.573(7)   |
| Gd1—O9                                 | 2.917(7)  |                                          |            |
|                                        |           |                                          |            |
| O3—Gd1—O9 <sup>#1</sup>                | 75.2(2)   | O5—Gd2—O11 <sup>#1</sup>                 | 74.3(2)    |
| O3—Gd1—O7                              | 86.4(2)   | O5—Gd2—O4                                | 88.2(2)    |
| O9 <sup>#1</sup> —Gd1—O7               | 88.9(2)   | O11 <sup>#1</sup> —Gd2—O4                | 88.0(2)    |
| O3—Gd1—O2 <sup>#1</sup>                | 128.9(2)  | O5—Gd2—O6 <sup>#2</sup>                  | 126.8(2)   |
| O9 <sup>#1</sup> —Gd1—O2 <sup>#1</sup> | 79.1(2)   | O11 <sup>#1</sup> —Gd2—O6 <sup>#2</sup>  | 79.5(2)    |
| O7—Gd1—O2 <sup>#1</sup>                | 136.5(2)  | O4—Gd2—O6 <sup>#2</sup>                  | 136.5(2)   |
| O3—Gd1—O12                             | 85.8(2)   | O5—Gd2—O10 <sup>#3</sup>                 | 84.9(2)    |
| O9 <sup>#1</sup> —Gd1—O12              | 122.4(2)  | O11 <sup>#1</sup> —Gd2—O10 <sup>#3</sup> | 122.8(2)   |
| O7—Gd1—O12                             | 144.2(2)  | O4—Gd2—O10 <sup>#3</sup>                 | 144.9(2)   |
| O2 <sup>#1</sup> —Gd1—O12              | 72.0(2)   | O6 <sup>#2</sup> —Gd2—O10 <sup>#3</sup>  | 71.7(2)    |
| O3—Gd1—O1W                             | 137.7(2)  | O5—Gd2—N3                                | 138.7(3)   |
| O9 <sup>#1</sup> —Gd1—O1W              | 70.4(2)   | O11 <sup>#1</sup> —Gd2—N3                | 146.5(2)   |
| O7—Gd1—O1W                             | 69.3(2)   | O4—Gd2—N3                                | 88.1(2)    |
| O2 <sup>#1</sup> —Gd1—O1W              | 67.3(2)   | O6 <sup>#2</sup> —Gd2—N3                 | 80.7(3)    |
| O12—Gd1—O1W                            | 133.6(2)  | O10 <sup>#3</sup> —Gd2—N3                | 75.1(2)    |
| O3—Gd1—N2                              | 138.9(3)  | O5—Gd2—O2W                               | 138.0(2)   |
| O9 <sup>#1</sup> —Gd1—N2               | 145.0(3)  | O11 <sup>#1</sup> —Gd2—O2W               | 70.2(2)    |
| O7—Gd1—N2                              | 86.8(2)   | O4—Gd2—O2W                               | 69.0(2)    |
| O2 <sup>#1</sup> —Gd1—N2               | 80.4(3)   | O6 <sup>#2</sup> —Gd2—O2W                | 67.5(2)    |
| O12—Gd1—N2                             | 76.6(2)   | O10 <sup>#3</sup> —Gd2—O2W               | 133.5(2)   |
| O1W—Gd1—N2                             | 75.6(3)   | N3—Gd2—O2W                               | 77.3(2)    |
| O3—Gd1—N1                              | 75.6(2)   | O5—Gd2—N4                                | 75.8(2)    |
| O9 <sup>#1</sup> —Gd1—N1               | 145.1(2)  | O11 <sup>#1</sup> —Gd2—N4                | 143.5(2)   |
| O7—Gd1—N1                              | 70.4(2)   | O4—Gd2—N4                                | 70.5(2)    |
| O2 <sup>#1</sup> —Gd1—N1               | 135.1(2)  | O6 <sup>#2</sup> —Gd2—N4                 | 136.2(2)   |
| O12—Gd1—N1                             | 73.8(2)   | O10 <sup>#3</sup> —Gd2—N4                | 74.4(2)    |
| O1W—Gd1—N1                             | 123.3(2)  | N3—Gd2—N4                                | 64.3(3)    |
| N2—Gd1—N1                              | 63.9(3)   | O2W—Gd2—N4                               | 124.1(2)   |
| O3—Gd1—O9                              | 66.4(2)   | O12—Gd1—O9                               | 51.16(18)  |
| O9 <sup>#1</sup> —Gd1—O9               | 71.6(2)   | O1W—Gd1—O9                               | 122.08(19) |
| O7—Gd1—O9                              | 149.5(2)  | N2—Gd1—O9                                | 122.6(2)   |
| O2 <sup>#1</sup> —Gd1—O9               | 63.83(19) | N1—Gd1—O9                                | 113.0(2)   |

<sup>a</sup>Symmetry codes: #1:  $-x+1, -y+2, -z+1$ ; #2:  $-x+2, -y+2, -z+1$ ; #3:  $x+1, y, z$ .

**Table S2.** Selected bond lengths (Å) and angles (°) for **3<sup>a</sup>**

|                                        |           |                                        |           |
|----------------------------------------|-----------|----------------------------------------|-----------|
| O6—Gd1 <sup>#1</sup>                   | 2.379(2)  | Gd1—O1                                 | 2.465(2)  |
| O6—Gd1 <sup>#2</sup>                   | 2.648(2)  | Gd1—O4 <sup>#3</sup>                   | 2.542(2)  |
| O5—Gd1 <sup>#2</sup>                   | 2.422(2)  | Gd1—O1W                                | 2.384(2)  |
| O3—Gd1 <sup>#3</sup>                   | 2.458(2)  | Gd1—O2                                 | 2.425(2)  |
| Gd1—O4                                 | 2.377(2)  |                                        |           |
|                                        |           |                                        |           |
| O4—Gd1—O6 <sup>#1</sup>                | 162.04(8) | O1W—Gd1—O1                             | 78.22(8)  |
| O4—Gd1—O1W                             | 88.30(8)  | O5 <sup>#4</sup> —Gd1—O1               | 146.02(8) |
| O6 <sup>#1</sup> —Gd1—O1W              | 80.04(9)  | O2—Gd1—O1                              | 53.22(8)  |
| O4—Gd1—O5 <sup>#4</sup>                | 74.62(8)  | O3 <sup>#3</sup> —Gd1—O1               | 129.31(8) |
| O6 <sup>#1</sup> —Gd1—O5 <sup>#4</sup> | 117.09(8) | O4—Gd1—O4 <sup>#3</sup>                | 66.68(9)  |
| O1W—Gd1—O5 <sup>#4</sup>               | 83.57(9)  | O6 <sup>#1</sup> —Gd1—O4 <sup>#3</sup> | 128.21(8) |
| O4—Gd1—O2                              | 96.78(9)  | O1W—Gd1—O4 <sup>#3</sup>               | 149.46(8) |
| O6 <sup>#1</sup> —Gd1—O2               | 80.03(8)  | O5 <sup>#4</sup> —Gd1—O4 <sup>#3</sup> | 73.39(8)  |
| O1W—Gd1—O2                             | 127.74(8) | O2—Gd1—O4 <sup>#3</sup>                | 74.78(8)  |
| O5 <sup>#4</sup> —Gd1—O2               | 147.85(9) | O3 <sup>#3</sup> —Gd1—O4 <sup>#3</sup> | 51.83(7)  |
| O4—Gd1—O3 <sup>#3</sup>                | 117.96(8) | O1—Gd1—O4 <sup>#3</sup>                | 110.42(8) |
| O6 <sup>#1</sup> —Gd1—O3 <sup>#3</sup> | 78.70(8)  | O4—Gd1—O6 <sup>#4</sup>                | 123.01(8) |
| O1W—Gd1—O3 <sup>#3</sup>               | 143.96(8) | O6 <sup>#1</sup> —Gd1—O6 <sup>#4</sup> | 66.34(9)  |
| O5 <sup>#4</sup> —Gd1—O3 <sup>#3</sup> | 80.68(9)  | O1W—Gd1—O6 <sup>#4</sup>               | 72.37(8)  |
| O2—Gd1—O3 <sup>#3</sup>                | 76.27(8)  | O5 <sup>#4</sup> —Gd1—O6 <sup>#4</sup> | 50.80(7)  |
| O4—Gd1—O1                              | 76.38(8)  | O2—Gd1—O6 <sup>#4</sup>                | 137.59(8) |
| O6 <sup>#1</sup> —Gd1—O1               | 87.82(8)  | O3 <sup>#3</sup> —Gd1—O6 <sup>#4</sup> | 72.53(8)  |
| O4 <sup>#3</sup> —Gd1—O6 <sup>#4</sup> | 105.93(7) | O1—Gd1—O6 <sup>#4</sup>                | 143.45(8) |

<sup>a</sup>Symmetry codes: #1:  $-x+1/2, -y+3/2, -z+1$ ; #2:  $x-1/2, y-1/2, z$ ; #3:  $-x, -y+2, -z+1$ ; #4:  $x+1/2, y+1/2, z$ .

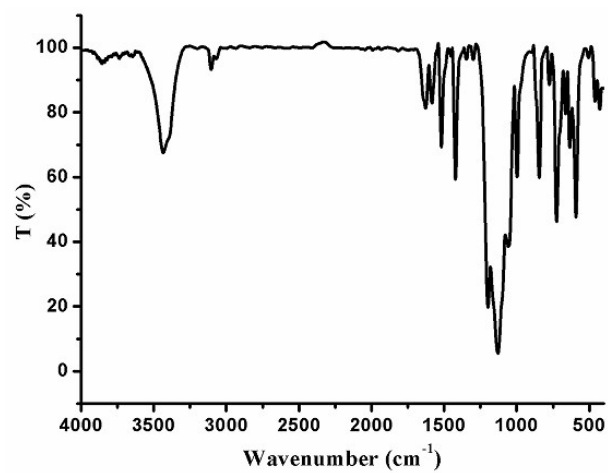

(a)

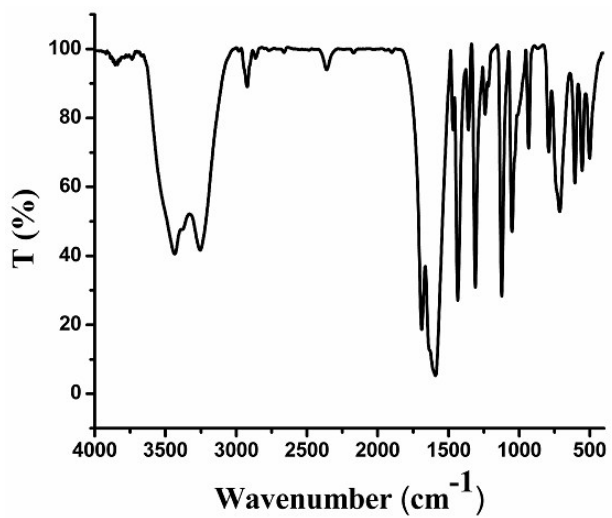

(b)

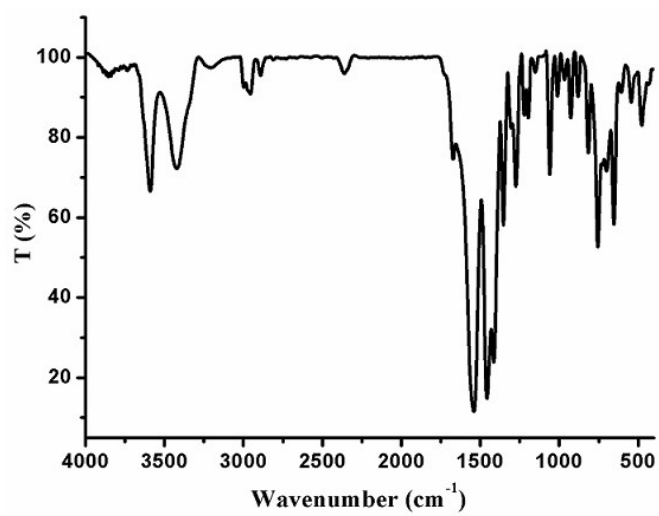

(c)

**Fig. S1.** The IR spectra of **1** (a), **2** (b) and **3** (c).

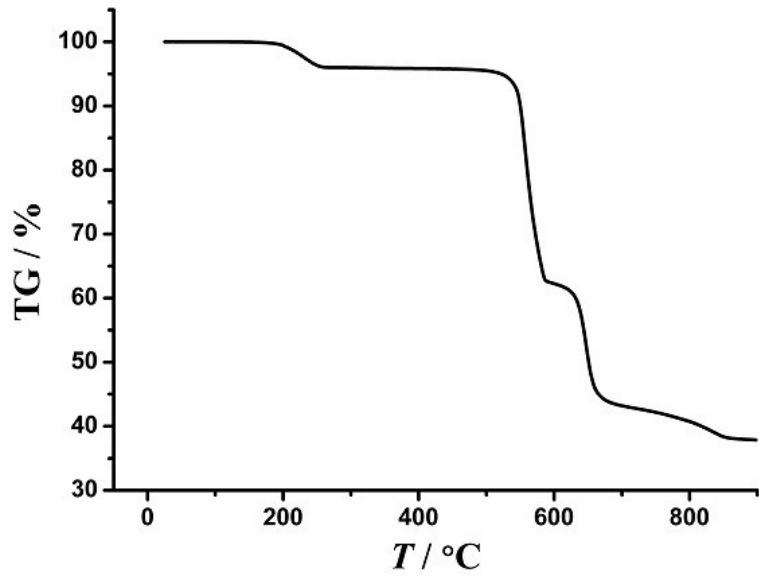

(a)

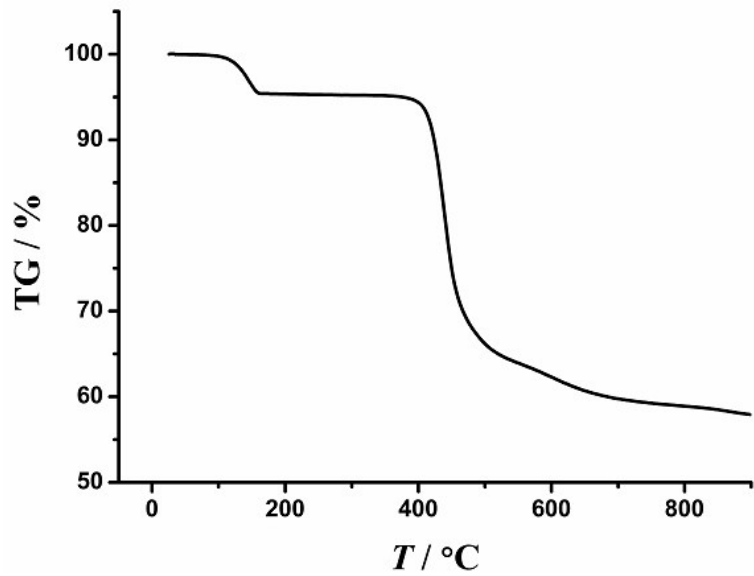

(b)

**Fig. S2.** The TGA curves for **1** (a) and **3** (b).

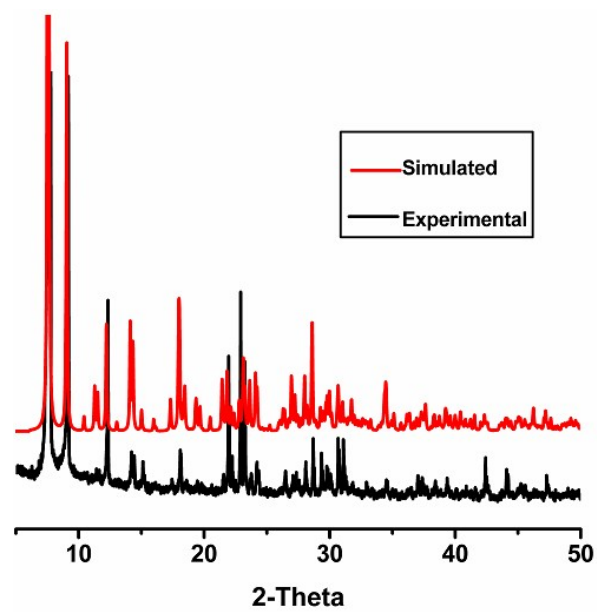

(a)

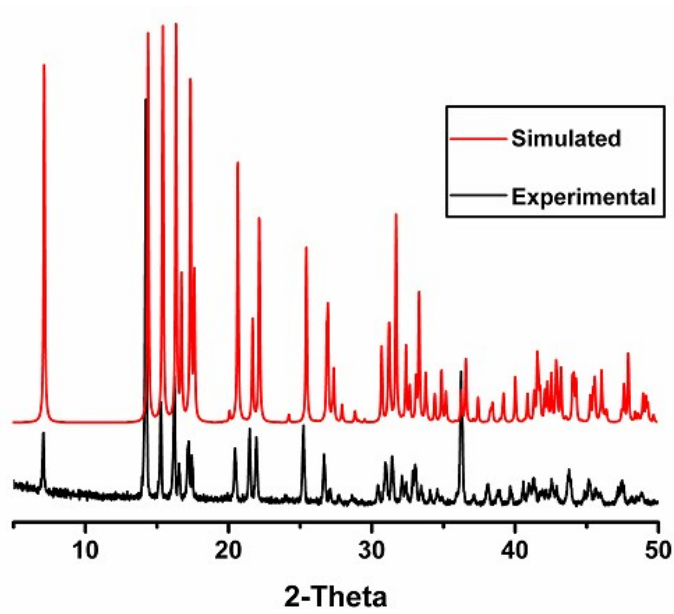

(b)

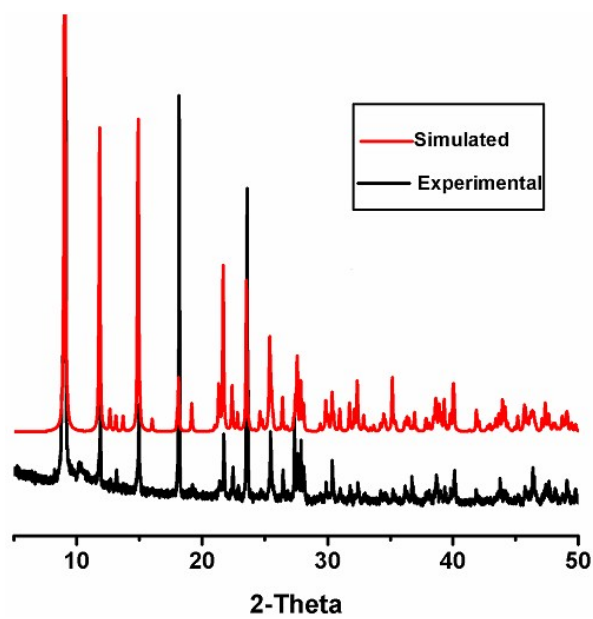

(c)

Fig. S3. Powder X-ray diffraction (PXRD) patterns of (a) **1**, (b) **2** and (c) **3**.

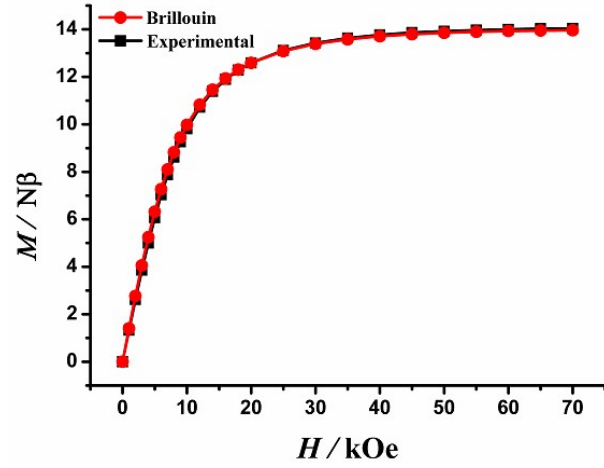

(a)

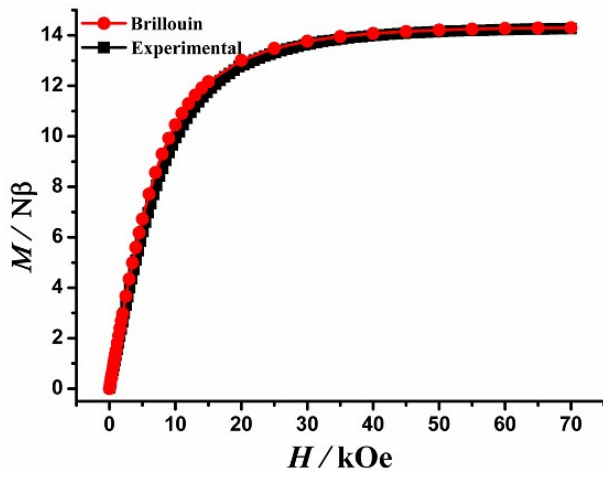

(b)

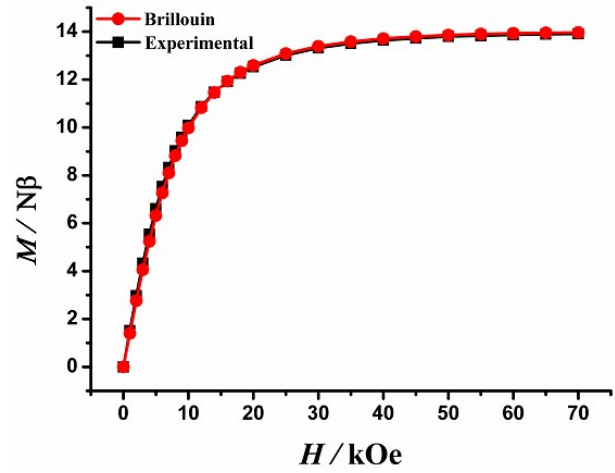

(c)

**Fig. S4.** The  $M$  vs.  $H$  plots of 1 (a), 2 (b) and 3 (c) in the field range 0-70 kOe.

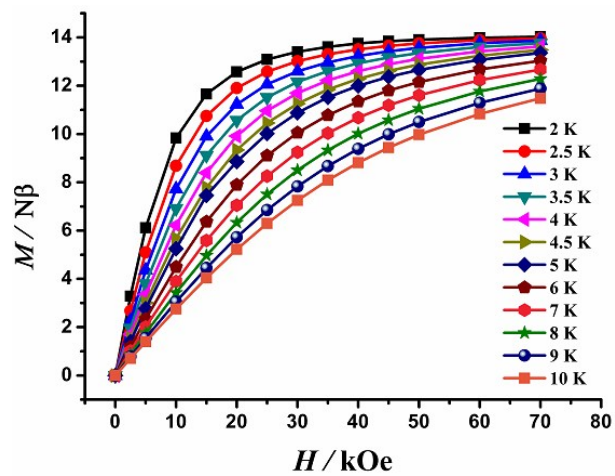

(a)

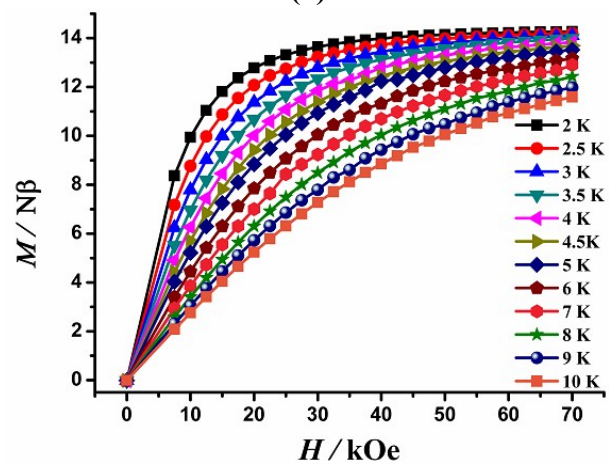

(b)

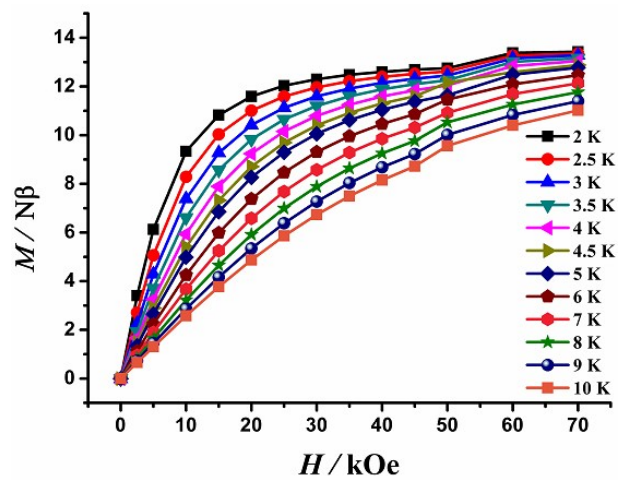

(c)

**Fig. S5.** The  $M$  vs.  $H$  curves of 1 (a), 2 (b) and 3 (c) in the temperature range 2-10 K.
